# Supplementary material for: Carbon partitioning between oil and carbohydrates in developing oat (Avena sativa L.) seeds
Source: PubMed Central journal article supplement — J Exp Bot. 2008 Nov;59(15):4247–57. doi: 10.1093/jxb/ern266 (PMC2639027; doi:10.1093/jxb/ern266), 2008-11
Supplement: ern266_1.pdf [file ern266_1.pdf]

## **Carbon partitioning between oil and carbohydrates in developing oat (*Avena sativa* L.) seeds**

Running title: Carbon partitioning in oat seeds

*Åsa Ekman<sup>1\*</sup>, Daniel M. Hayden<sup>2</sup>, Katayoon Dehesh<sup>2</sup>, Leif Bülow<sup>3</sup>, Sten Stymne<sup>1</sup>.*

*<sup>1</sup>Department of Plant Breeding and Biotechnology, Swedish University of Agricultural Sciences, P.O. Box 101, SE-230 53 Alnarp, Sweden. <sup>2</sup>Department of Plant Biology, University of California Davis, CA 95616, USA. <sup>3</sup>Department of Pure and Applied Biochemistry, Centre for Chemistry and Chemical Engineering, Lund University, P.O. Box 124, SE-22100, Sweden.*

**Table S1.** Definitions of stages A-J of seed development *in planta*.

| Days post anthesis (dpa) | Dev. stage | Seed length (mm) (trichomes not included) | Fresh weight (mg/seed) | %DW | Color (crease side/back side/spikelets) | Trichomes and crease                                                     | Filling                                                   |
|--------------------------|------------|-------------------------------------------|------------------------|-----|-----------------------------------------|--------------------------------------------------------------------------|-----------------------------------------------------------|
| 0                        | A          | 2                                         | 5                      | -   | white/white/green                       | Trichomes give the seed a white appearance                               | No filling                                                |
| 2                        | B          | 3-5                                       | 10                     | 10  | green/green/green                       | Trichomes give the seed a silvery appearance                             | Empty green sac                                           |
| 4                        | C          | 5-7                                       | 15                     | 15  | green/green/green                       | Trichomes give the seed a silvery appearance                             | White, almost empty sac                                   |
| 10                       | D          | 7-9                                       | 25                     | 25  | green/green/green                       | Silvery appearance is gone, crease can be seen                           | White sac starting to fill up with milky endosperm        |
| 14                       | E          | 9-11                                      | 35                     | 35  | green/green/green                       | Trichomes seen mostly in top, crease more clear (seed more filled, firm) | Milky white endosperm                                     |
| 20                       | G          | 9-11                                      | 45-50                  | 45  | pale green/yellow/ partly yellow        | Trichomes seen mostly in top                                             | Milky white endosperm, starting to solidify               |
| 25                       | I          | 9-11                                      | 37                     | 60  | yellow/yellow/ partly yellow            | Trichomes seen mostly in top                                             | Half (top) seed has started to dry, half seed still milky |
| 30                       | J          | 9-11                                      | 30-35                  | 88  | brownish/ brownish/ yellow              | Trichomes seen mostly in top                                             | Hard, dry, starchy endosperm                              |
